# Supplementary material for: Feasibility of the Mio-Training: A metacognitive training for children and adolescents
Source: Research Square preprint supplement (doi:10.21203/rs.3.rs-8163350/v1), 2025-12-17
Supplement: Supplementary file 1 [file 2f690e31c9b882a7794548bf.docx]

**Supplementary**

**Table S1**

Correlations between feasibility scores, age, intelligence, socioeconomic status and compliance

|  |  | Age | IQ | SES | Compliance |
| --- | --- | --- | --- | --- | --- |
| **Enjoyment** |  |  |  |  |  |
| Enjoyment of the training | *r*  *p* | -.116  .627 | -.009  .971 | .390  .089 | .457  .043* |
| Pressure/tension | *r*  *p* | -.112  .637 | .267  .256 | -.164  .490 | -.267  .256 |
| Perceived difficulty | *r*  *p* | .190  .422 | -.364  .114 | .271  .247 | .500  .025* |
| Motivation | *r*  *p* | -.184  .450 | .091  .712 | .429  .067 | .515  .024* |
| App use in everyday life | *r*  *p* | -.345  .136 | .049  .837 | .325  .162 | .307  .188 |
| Design of the training | *r*  *p* | -.160  .501 | .112  .637 | .467  .038* | .652  .002** |
| Metacognitive questions | *r*  *p* | .099  .687 | .058  .813 | .199  .415 | .373  .115 |
| Physical activity | *r*  *p* | -.411  .072 | -.056  .815 | .385  .094 | .698  <.001** |
| **Usability** |  |  |  |  |  |
| Usability | *r*  *p* | -.031  .898 | .070  .768 | .161  .496 | .344  .137 |
| Perceived duration of the training | *r*  *p* | .114  .631 | -.008  .972 | .188  .429 | .565  .009** |
| **Level of autonomy** |  |  |  |  |  |
| Accessibility | *r*  *p* | .334  .151 | .243  .302 | -.059  .803 | .236  .316 |
| Perceived flexibility | *r*  *p* | .036  .881 | -.285  .224 | .532  .016* | .455  .044* |
| **Perceived impact** |  |  |  |  |  |
| Self-efficacy | *r*  *p* | -.430  .075 | -.116  .648 | .565  .015* | .590  .010* |
| Strategy use | *r*  *p* | -.110  .654 | .113  .643 | .172  .481 | .032  .894 |
| **User data** |  |  |  |  |  |
| Session duration | *r*  *p* | -.197  .403 | -.130  .586 | .247  .293 | .353  .138 |
| Compliance (%) | *r*  *p* | -.133  .575 | -.119  .617 | .314  .177 | - |

*Note.* r = Spearman’s roh; p = significance (α < .05 = *, α < .01 = **). IQ = Intelligence, SES = socioeconomic status.

**Table S2**

Feasibility scorings and sex differences

|  | Male | Female | *t* | *df* | *p* | *d* |
| --- | --- | --- | --- | --- | --- | --- |
| **Enjoyment** |  |  |  |  |  |  |
| Enjoyment of the training | 3.09 | 2.90 | 0.79 | 17.9 | .441 | 0.35 |
| Pressure/tension | 3.43 | 3.40 | 0.13 | 16.9 | .899 | 0.06 |
| Perceived difficulty | 3.05 | 3.30 | -1.03 | 17.2 | .318 | -0.46 |
| Motivation | 3.22 | 2.75 | 1.36 | 13.6 | .197 | 0.60 |
| App use in everyday life | 2.20 | 1.90 | 1.34 | 16.6 | .198 | 0.60 |
| Design of the training | 3.19 | 3.26 | -0.39 | 17.5 | .699 | -0.18 |
| Metacognitive questions | 3.22 | 2.97 | 0.73 | 16.4 | .478 | 0.33 |
| Physical activity | 3.04 | 2.96 | 0.33 | 18.0 | .747 | 0.15 |
| **Usability** |  |  |  |  |  |  |
| Usability | 3.39 | 3.34 | 0.23 | 18.0 | .821 | 0.10 |
| Perceived duration of the training | 3.00 | 2.33 | 2.53 | 18.0 | .021* | 1.13 |
| **Level of autonomy** |  |  |  |  |  |  |
| Accessibility | 3.60 | 3.50 | 0.35 | 17.2 | .732 | 0.16 |
| Perceived flexibility | 2.90 | 2.80 | 0.31 | 16.5 | .763 | 0.14 |
| **Perceived impact** |  |  |  |  |  |  |
| Self-efficacy | 2.95 | 2.46 | 2.23 | 15.9 | .041* | 1.05 |
| Strategy use | 2.84 | 3.02 | -0.51 | 17.0 | .618 | -0.23 |
| **User data** |  |  |  |  |  |  |
| Session duration | 17.88 | 20.60 | -1.02 | 16.2 | 0.321 | -0.46 |
| Compliance (%) | 98.00 | 92.67 | 0.94 | 10.2 | 0.368 | 0.42 |

*Note.* Data presented as: *t =* independent t-test*; df =* degrees of freedom*, p* = significance (α < .05 = *, α < .01 = **), *d* = effect size (Cohens’d; small effect *d* = 0.2, moderate effect *d* = 0.5, large effect *d* = 0.8).

**Table S3**

Absolute and relative changes and group differences in performance before the teaching and practicing of mnemonic strategies (“tricks”) and the long-term recall

|  | Without mnemonic strategy use | Long-term recall | Absolute change | Relative change | *U* | *p* | *g* |
| --- | --- | --- | --- | --- | --- | --- | --- |
| **Similarity trick** | 26.19 (35.84) | 79.05 (34.34) | 52.86 (41.25) | 2.18 (3.42) | 1.0 | <.001** | 1.448 |
| **TV-trick** | 35.34 (38.97) | 51.78 (39.68) | 14.68 (43.43) | 0.45 (1.30) | 35.5 | .173 | .358 |
| **Story trick** | 47.30 (33.67) | 59.37 (40.66) | 20.18 (19.48) | 0.42 (0.44) | 14.0 | .030* | .298 |
| **Symbol trick** | 56.89 (41.96) | 62.26 (39.34) | 5.37 (32.85) | 0.45 (1.22) | 11.0 | .191 | .126 |
| **Echo trick** | 25.10 (24.93) | 26.63 (30.84) | 0.14 (19.65) | -0.06 (0.64) | 29.0 | .755 | .005 |

Notes. Group differences were calculated to compare the mean values between the groups ”without strategy” and “long-term recall”: U = Mann-Whitney-U-test; p = significance (α < .05 = *, α < .01 = **); g = effect size (Hedge’s g; small effect g = 0.2, moderate effect g = 0.5, large effect g = 0.8). Change scores were calculated accordingly: absolute changes (long-term – without strategy), relative changes (long-term – without strategy/without strategy).

**Table S4**

Absolute and relative changes and group differences in performance after the teaching and practicing of mnemonic strategies (“tricks”) and the long-term recall

|  | With mnemonic strategy use | Long-term recall | Absolute change | Relative change | *U* | *p* | *g* |
| --- | --- | --- | --- | --- | --- | --- | --- |
| **Similarity trick** | 62.86 (43.38) | 79.05 (34.34) | 16.19 (31.86) | 0.09 (0.20) | 0.0 | .022* | .387 |
| **TV-trick** | 57.14 (43.03) | 51.78 (39.68) | -14.22 (49.48) | 0.23 (2.03) | 22.0 | .108 | .193 |
| **Story trick** | 65.71 (36.65) | 59.37 (40.66) | -3.85 (32.03) | -0.04 (0.54) | 52.0 | .327 | .156 |
| **Symbol trick** | - | 62.26 (39.34) | - | - | - | - | - |
| **Echo trick** | 36.11 (31.33) | 26.63 (30.84) | -11.49 (24.34) | -0.32 (0.48) | 46.0 | .066 | .355 |

Notes. Group differences were calculated to compare the mean values between the groups ”with strategy” and “long-term recall”: U = Mann-Whitney-U-test; p = significance (α < .05 = *, α < .01 = **); g = effect size (Hedge’s g; small effect g = 0.2, moderate effect g = 0.5, large effect g = 0.8). Change scores were calculated accordingly: absolute changes (long-term – with strategy), relative changes (long-term – with strategy/with strategy).

**
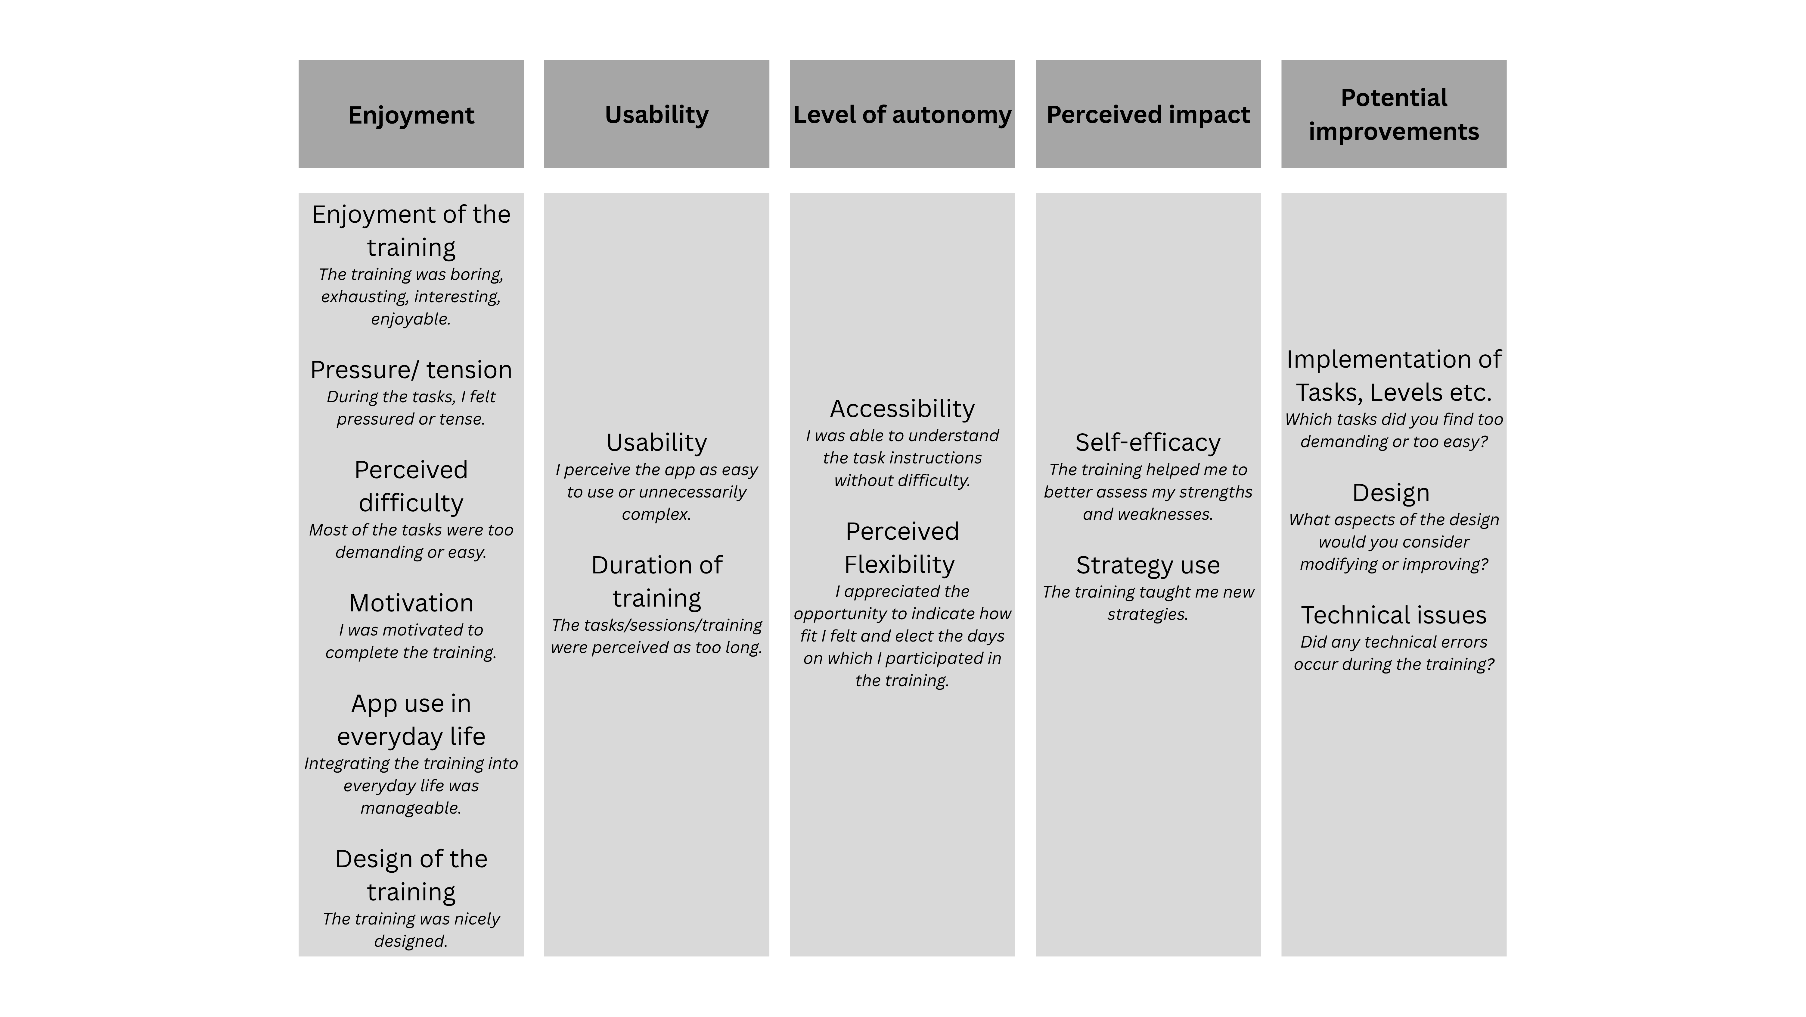
**

**Figure S1**. Subscales of the feasibility questionnaire.

*Note.* Examples of questions are italicized below the subscales.


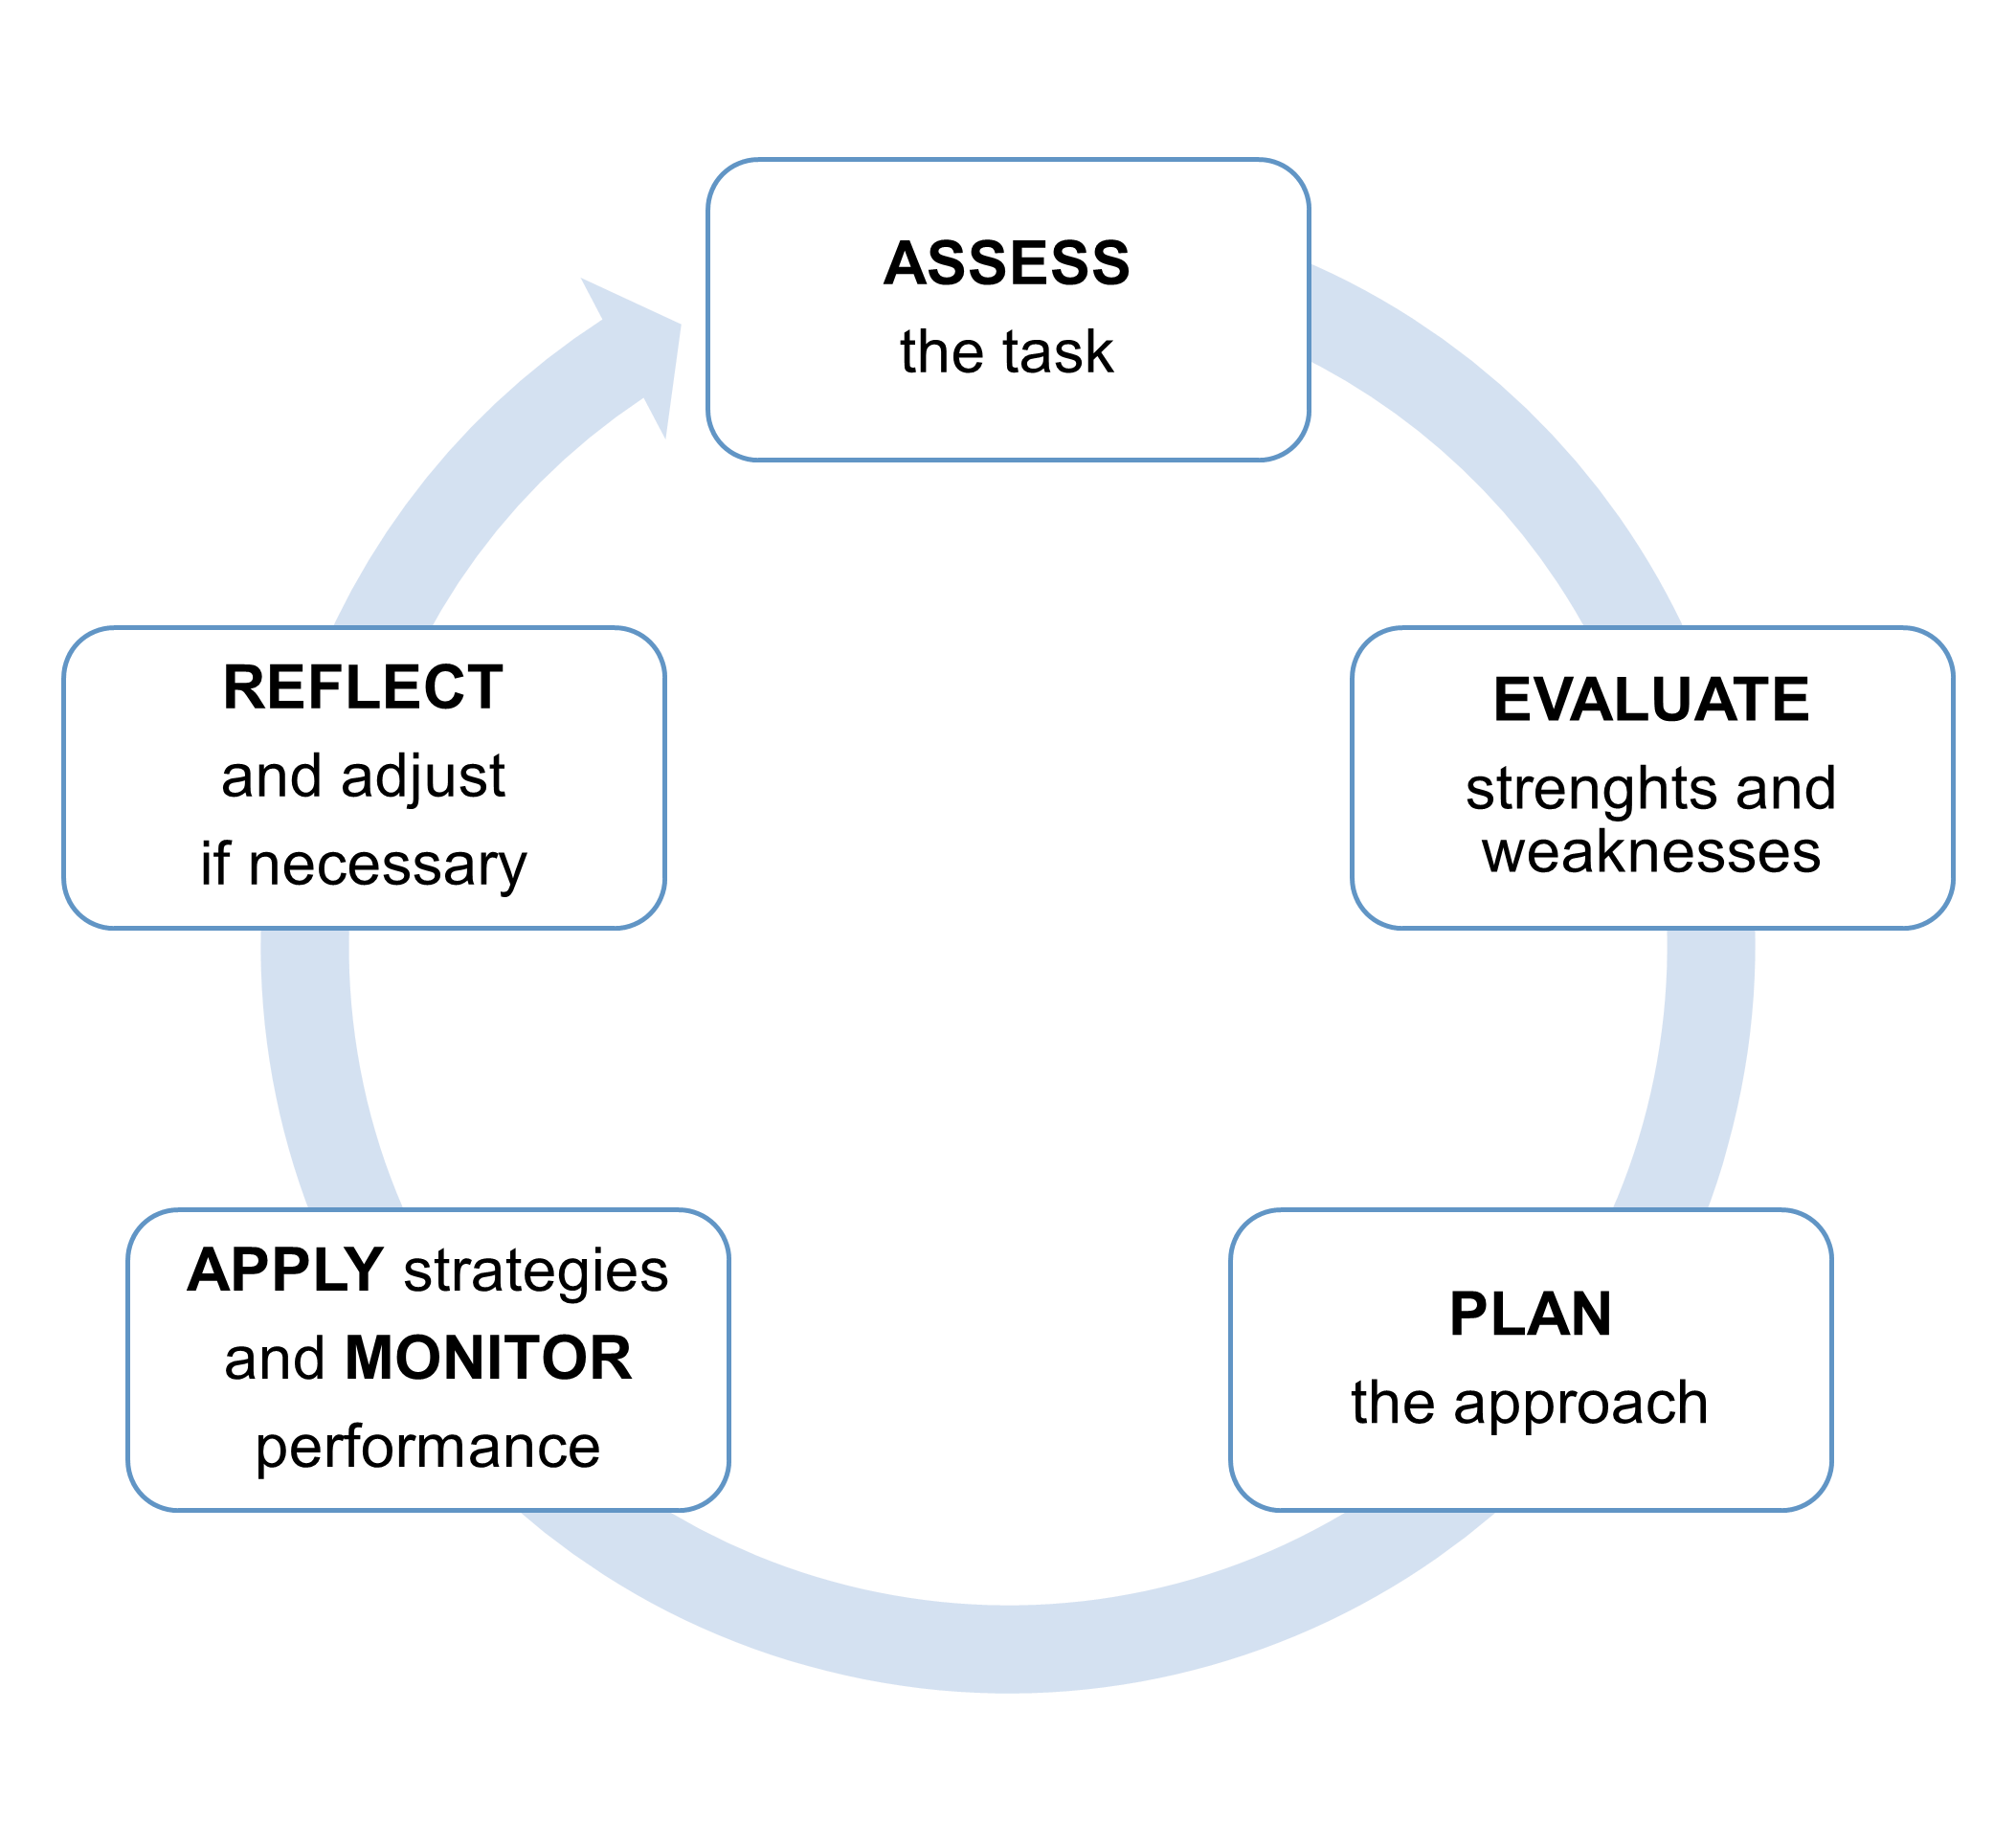


**Figure S2.**Metacognitive cycle adapted from Ambrose et al. 2010.

Supplementary material S1

**Feasibility questionnaire**

On the following pages, we ask you to give your **honest feedback on your experience** of using the Mio-App. As you read the statements, please try to think about **what it was like for you** to use the Mio-App.

| Task design | Strongly disagree | Somewhat disagree | Somewhat agree | Strongly agree |
| --- | --- | --- | --- | --- |
| I understood the explanations of the tasks without any problems. |  |  |  |  |
| The tasks took too long. |  |  |  |  |
| The sessions took too long. |  |  |  |  |
| Most of the tasks were too difficult for me. |  |  |  |  |
| Most of the tasks were too easy for me. |  |  |  |  |
| Three sessions per week are too many. |  |  |  |  |
| I could easily do more than three sessions per week. |  |  |  |  |
| I completed the tasks without help from my parents or friends. |  |  |  |  |
| Which tasks did you particularly enjoy? |  |  |  |  |
| Which tasks were too strenuous? |  |  |  |  |
| Which tasks were too difficult? |  |  |  |  |
| Which tasks were too easy? |  |  |  |  |

| Design/storyline | Strongly disagree | Somewhat disagree | Somewhat agree | Strongly agree |
| --- | --- | --- | --- | --- |
| The App had an appealing design. |  |  |  |  |
| I was interested in the story of the game. |  |  |  |  |
| I wanted to know how the story continued. |  |  |  |  |
| There was too much text for me. |  |  |  |  |
| I would like the training to contain more story. |  |  |  |  |
| I liked the characters of the training. |  |  |  |  |
| I thought the space theme was appropriate for the training. |  |  |  |  |
| What would you change about the design/layout? | | | |  |
| What would you change about the story? |  |  |  |  |

| General satisfaction | Strongly disagree | Somewhat disagree | Somewhat agree | Strongly agree |
| --- | --- | --- | --- | --- |
| I found the training boring. |  |  |  |  |
| I found the training frustrating. |  |  |  |  |
| I enjoyed doing the training. |  |  |  |  |
| I had fun doing the training. |  |  |  |  |
| I found the training mentally exhausting. |  |  |  |  |
| I found the training physically exhausting. |  |  |  |  |
| I found the tasks interesting. |  |  |  |  |
| I would recommend the App to my friends. |  |  |  |  |
| At the end of each session, I was already looking forward to the next one. |  |  |  |  |
| I would do the training again at a later date. |  |  |  |  |
| What could be changed to make the training more enjoyable for you? | | | |  |

| Motivation | Strongly disagree | Somewhat disagree | Somewhat agree | Strongly agree |
| --- | --- | --- | --- | --- |
| I was motivated to do the training. |  |  |  |  |
| The rewards (stars) motivated me to complete the training. |  |  |  |  |
| I found it easy to complete the training. |  |  |  |  |
| I only did the training because my parents or others wanted me to. |  |  |  |  |
| What motivated you to complete the training? | | | |  |
| If you didn’t complete the training: What would motivate you to complete the training? | | | |  |
| Was there anything missing that would have motivated you even more to do the training? | | | | |

| Perceived autonomy | Strongly disagree | Somewhat disagree | Somewhat agree | Strongly agree |
| --- | --- | --- | --- | --- |
| It was great that I could always indicate how fit I am. |  |  |  |  |
| I liked the option to choose which days I train. |  |  |  |  |
| I always chose the same difficulty level (how fit I feel). |  |  |  |  |
| Are the different levels (such as the questions about how fit you are) necessary? | | | | |

| Use in everyday life | Strongly disagree | Somewhat disagree | Somewhat agree | Strongly agree |
| --- | --- | --- | --- | --- |
| It was easy to integrate the training into my daily routine. I found time for it. |  |  |  |  |
| The training helped me perform better at school. |  |  |  |  |
| I believe the training helped me feel better in my everyday life. |  |  |  |  |
| I did some of the sessions more than once. |  |  |  |  |
| I now use the strategies in my everyday life. |  |  |  |  |
| I now use the strategies at school. |  |  |  |  |
| I will remember the strategies in the future. |  |  |  |  |
| I will remember the tasks in the future. |  |  |  |  |
| Did you do the training only at home? Or also on the go? | | | |  |
| Did you do the training alone? Or did someone help you sometimes? | | | |  |

| Performance assessment | Strongly disagree | Somewhat disagree | Somewhat agree | Strongly agree |
| --- | --- | --- | --- | --- |
| I am satisfied with my performance in the tasks. |  |  |  |  |
| I performed well during the tasks. |  |  |  |  |
| I felt under pressure during the tasks. |  |  |  |  |
| I felt tense during the training. |  |  |  |  |
| I was concerned that I would not do well in the training. |  |  |  |  |
| My performance improved over the course of the training. |  |  |  |  |
| In which tasks did you improve? |  |  |  |  |

| Questions before and after the tasks | Strongly disagree | Somewhat disagree | Somewhat agree | Strongly agree |
| --- | --- | --- | --- | --- |
| The training helped me to better evaluate my strengths and weaknesses. |  |  |  |  |
| The questions before and after the tasks were helpful. |  |  |  |  |
| The questions before and after the tasks were exhausting. |  |  |  |  |
| The questions before and after the tasks were stressful. |  |  |  |  |
| I answered the questions accurately. |  |  |  |  |
| I thought about the questions before answering them. |  |  |  |  |
| The training taught me new tricks to learn better. |  |  |  |  |
| Do you have suggestions on how the questions could be designed differently? |  |  |  |  |

| Coordinative challenges | Strongly disagree | Somewhat disagree | Somewhat agree | Strongly agree |
| --- | --- | --- | --- | --- |
| I always actively participated in the coordinative challenges. |  |  |  |  |
| The coordinative challenges were well designed. |  |  |  |  |
| I enjoyed the coordinative challenges. |  |  |  |  |
| The coordinative challenges were boring. |  |  |  |  |
| The coordinative challenges were motivating. |  |  |  |  |
| The coordinative challenges were strenuous. |  |  |  |  |
| The coordinative challenges helped me to concentrate better on my tasks afterwards. |  |  |  |  |
| I repeated the coordinative challenges outside of the App. |  |  |  |  |
| Do you have suggestions on how the coordinative challenges could be designed differently? | | | |  |
| What would increase your motivation to do the coordinative challenges? | | | |  |
| How many of the coordinative challenges did you do? Which ones? | | | |  |

| Usability | Strongly disagree | Somewhat disagree | Somewhat agree | | | Strongly agree |
| --- | --- | --- | --- | --- | --- | --- |
| I can easily imagine using the App regularly. |  |  |  | | |  |
| The App was unnecessarily complicated. |  |  |  | | |  |
| The App was easy to use. |  |  |  | | |  |
| I needed (technical) assistance to use the App. |  |  |  | | |  |
| The various questions and games in the App are well integrated. |  |  |  | | |  |
| I can imagine that most people will quickly know how to use the App. |  |  |  | | |  |
| This App is very cumbersome to use. |  |  |  | | |  |
| I had to learn a lot of things before I could use the App. |  |  |  | | |  |
| Did you experience any (technical) difficulties with the App? | | | |  | | |
| Did anything in the App not work? | | | | |  | |

Was there anything missing in the App?

What other feedback would you like to share with us regarding the App?
